# Supplementary material for: Soluble Thy-1 reverses lung fibrosis via its integrin-binding motif
Source: JCI journal article supplement (doi:10.1172/jci.insight.131152), 2019-10-31
Supplement: sd1 [file 1]

**Supplemental Figure.** Bleomycin (Bleo)-induced acute injury in *Thy1<sup>-/-</sup>* and wild type (WT) mice. **(A)** Experimental scheme. Mice were induced with single Bleo (4U/kg in 100  $\mu$ L saline) or saline by orotracheal intubation/MicroSprayer. Bronchoalveolar lavage fluid (BALF) and lungs were collected at day 3 (n=6/group). **(B)** Total protein in BALF. **(C)** H&E staining. Scale bar: 100 $\mu$ m. **(D, E)** Total cells & differentials counts in BALF of *Thy1<sup>-/-</sup>* and WT mice. Results are presented as Mean  $\pm$  SEM. Statistical analysis was performed using one-way ANOVA, \* $P$ <0.05, \*\* $P$ <0.01 versus controls.

# Supplemental figure

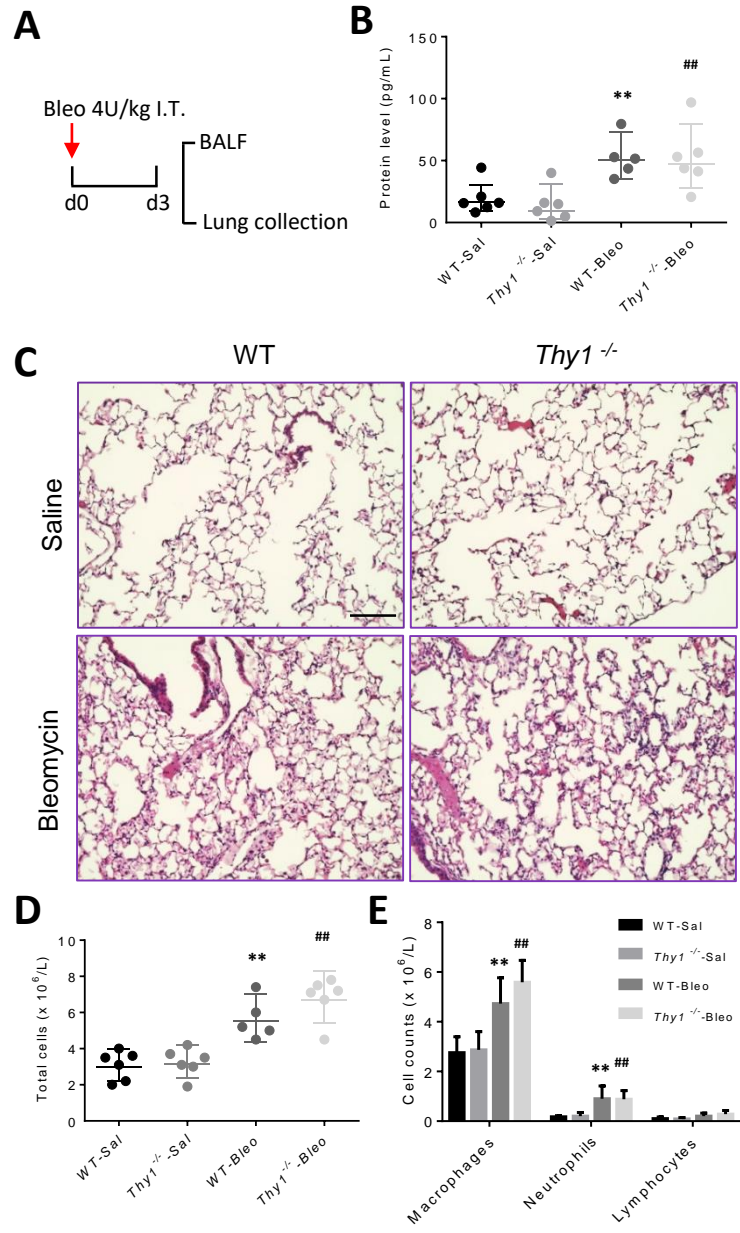

| <b>Gene Name</b> | <b>Forward</b>               | <b>Reverse</b>                  |
|------------------|------------------------------|---------------------------------|
| <i>Thy1</i>      | 5'-GGGCGACTACTTTTGTGAGC-3'   | 5'-TCTGAACCAGCAGGCTTATG-3'      |
| <i>Col1a1</i>    | 5'-ACATGTTTCAGCTTTGTGGACC-3' | 5'-TAGGCCATTGTGTATGCAGC-3'      |
| <i>Col3a1</i>    | 5'-ATTGCTGGGATCACTGGAGCAC-3' | 5'-CCTGGTTTCCCACCTTTCACCCTTG-3' |
| <i>Acta2</i>     | 5'-ACTGGGACGACATGGAAAAG-3'   | 5'-GTTCAGTGGTGCCTCTGTCA-3'      |
| <i>Tgfb1</i>     | 5'-GGAGAGCCCTGGATACCAAC-3'   | 5'-CAACCCAGGTCCTTCCTAAA-3'      |
| <i>Actb</i>      | 5'-CTAAGGCCAACCGTGAAAAGAT-3' | 5'-CACAGCCTGGATGGCTACGT-3'      |
| <i>B2m</i>       | 5'-ATCGAGACATGTGATCAAGC-3'   | 5'-GCGTGCATAAATTGTATAGC-3'      |

578 Supplemental table 1. Murine qPCR primer sequences
